# Supplementary material for: USP10 deletion inhibits macrophage-derived foam cell formation and cellular-oxidized low density lipoprotein uptake by promoting the degradation of CD36
Source: publisher site journal article supplement (doi:10.18632/aging.104003), 2020-11-10
Supplement: Supplementary file [file aging-v12i22-104003-supplementary-material-SD1.pdf]

## SUPPLEMENTARY FIGURE

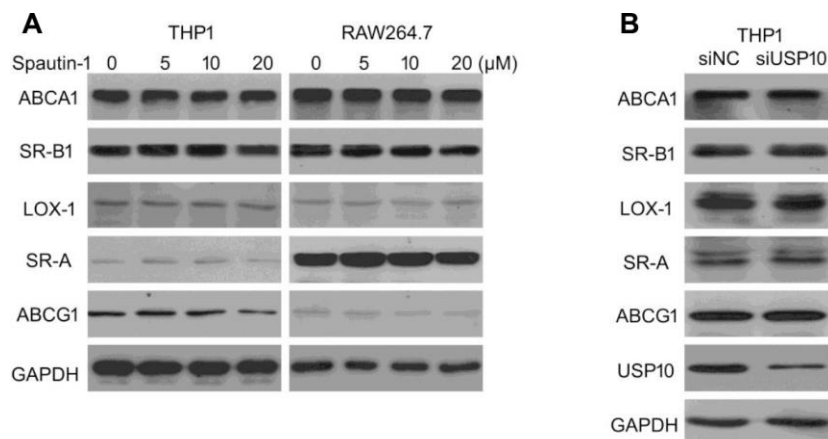

**Supplementary Figure 1.** USP10 mediates lipid uptake by macrophage. **(A)** Cells were treated with Spautin-1. Western blot assay was employed for ABCA1, ABCG1, SR-A, SR-B1 and Lox-1 protein expressions. **(B)** THP1 cell was exposed to USP10 siRNA and then test proteins expressions, including in ABCA1, ABCG1, SR-A, SR-B1 and Lox-1 protein expressions.
